# Supplementary material
Source: MDPI journal article supplement (https://www.mdpi.com/2036-7481/14/2/38)
Supplement: s1 [file s1]

Archive with 2 entries (2 files):
- Nikolaou et al_Supplementary Figure S1.pdf
- Nikolaou et al_Supplementary Table.xlsx
