# Supplementary material
Source: MDPI journal article supplement (https://www.mdpi.com/2036-7481/14/2/38)
Supplement: s1 [file s1 › Nikolaou et al_Supplementary Figure S1.pdf]

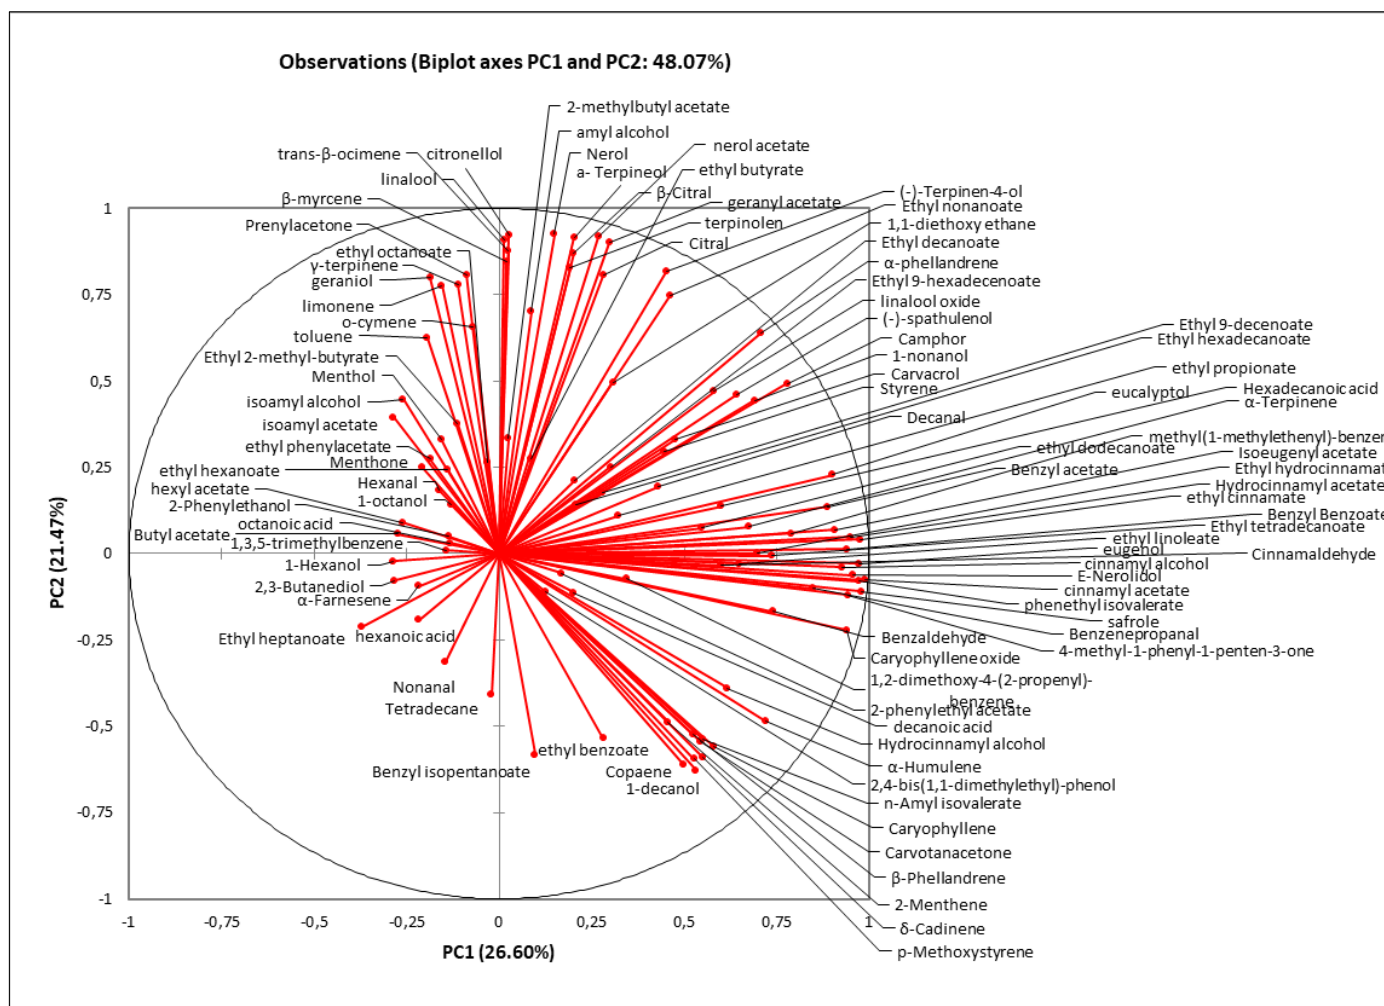

Figure S1: Biplot showing the projection of the minor volatiles on the first two principal components of the PCA.
