# Supplementary material
Source: MDPI journal article supplement (https://www.mdpi.com/2036-7481/14/2/38)
Supplement: s1 [file s1 › Nikolaou et al_Supplementary Table.xlsx]

## Sheet: Sheet1
Table S1: Minor volatiles (mg/L) detected by HS-SPME GC/MS analysis in Sangria-type low-alcohol wines with immobilized kefir cultures and essential oils.
Volatile compounds		Minor volatile compounds (mg/L) identified by HS-SPME GC/MS in low-alcohol wines with immobilized kefir cultures and essential oils. Volatiles were semi-quantified using 4-methyl-2-pentanol as an internal standard.
Esters	Kovats	Cm_Wt_Ap	Cm_ThDr_Ap	Cm_FrDr_Ap	Cm_Wt_Pe	Cm_ThDr_Pe	Cm_FrDr_Pe	Cz_Wt_Ap	Cz_ThDr_Ap	Cz_FrDr_Ap	Cz_Wt_Pe	Cz_ThDr_Pe	Cz_FrDr_Pe	Mix_Wt_Ap	Mix_ThDr_Ap	Mix_FrDr_Ap	Mix_Wt_Pe	Mix_ThDr_Pe	Mix_FrDr_Pe	Co_Wt_Ap	Co_ThDr_Ap	Co_FrDr_Ap	Co_Wt_Pe	Co_ThDr_Pe	Co_FrDr_Pe
Ethyl propionate	707	0	0	0.431695	0.393932	0	0	1.06632	0.111541	0.0877205	0.0213813	0.01	0.0227022	1.38984	0.752947	0.689599	0.183383	0.1	0.369895	1.10881	0.623247	1.19555	0.334966	0	0
Ethyl butyrate	803	2.09943	0	0.176343	0.63618	0	0.334366	1.15221	0.0650344	0.0350836	0.0260572	0	0.0164292	0.995785	0.7	0.179725	0.354995	0.248032	1.08725	1.3344	0.300044	0.708492	0.648274	0.327908	0.1
Butyl acetate	812	0.52525	0	0	2.07663	0	0	0.193504	0	0	0.361772	0	0	0	0	0	2.17657	0	0	0	0	0	4.08856	0	0
Ethyl 2-methyl-butyrate	841	1.56096	0	0	1.84469	0.490674	0.202525	0.774874	0.0244023	0	0.0417731	0.109713	0.0234599	0.6828	0	0	0.202542	0.883873	0.271367	1.22809	0.0957026	0	0.476901	0.926159	0
Isoamyl acetate	867	2.77877	1.85604	1.18507	4.03898	1.02228	1.04524	1.82845	0.329207	0.19071	0.274841	0.227688	0.0866645	1.52013	1.8341	0.396443	1.36153	1.50553	1.07854	2.35613	1.33872	4.30985	3.05993	0.867917	1.23983
2-methylbutyl acetate	869	3.12466	0.477976	0.318309	0.640987	0.282046	0.31695	1.40283	0.0492091	0.0304079	0.0364562	0.0285525	0.0147131	1.48937	0.36901	0.108382	0.189571	0.327228	0.247087	1.22979	0.222946	0.609203	0.343678	0.154753	0.1
Ethyl hexanoate	1002	53.7542	20.4298	21.0406	13.6604	7.41871	19.5977	31.4784	5.34819	3.38088	1.31341	1.98362	1.62785	34.0725	19.999	9.94046	4.33704	9.39913	12.4608	44.9837	17.3997	65.0255	14.3677	9.29864	17.7829
Hexyl acetate	1018	1.55082	0.942326	1.45	18.4369	0.989486	0.731623	0.730272	0	0	2.51754	0.0434807	0	1.3889	0.706496	0.313811	12.4215	1.48733	0.579429	0.642651	0	0	38.9907	0.280807	0
n-Amyl isovalerate	1120	0	0	0	0	0	0	1.62914	0.657244	1.94043	0.101436	0.1	0.361107	0	0	0	0	0	0	0	0	0	0	0	0
Ethyl heptanoate	1126	0	0	0	0	0	0	0	0	0	0	0	0	0	0	0	0	0	0	0.531215	0.27907	0	0.398919	0.633866	0
Benzyl acetate	1175.54	0	0	0	0	0	0	1.36017	0.460093	0.569716	0.12786	0.410873	0.10986	1.36589	1.06911	0.633192	1	1.6524	0.7065	0	0	0	0	0	0
Ethyl benzoate	1178	0	0	0	0	0	0	0	0.454612	0.569468	0	0.536348	0.102254	0	0	0	0	0	0	0	0	0	0	0	0
Ethyl octanoate	1202	159.988	120.965	243.11	118.931	56.3246	117.543	161.609	71.7269	69.2393	10.842	34.0122	20.8043	180.222	150.327	119.105	42.6984	105.732	98.6891	95.8671	77.4067	555.617	122.336	112.886	58.2596
Ethyl phenylacetate	1251	1.20585	0	0	2.42169	0	0	0.628747	0	0	0.183626	0	0	1.35783	0	0	1.45	0	0	0.495923	0.146448	0	0.693431	0.518087	0.994445
2-phenylethyl acetate	1261.73	0	0	0	0	0	0	106.144	44.8897	44.2382	9.85493	14.1669	8.07846	180.905	155.823	52.6872	49.9265	150.701	27.41	102.947	74.99	269.973	101.993	72.7203	254.589
Ethyl nonanoate	1307	1.26955	1.95526	3.60954	1.45299	1.52352	1.20961	1.16029	0.90124	1.03806	0.126583	1.11513	0.248014	2.40531	2.78835	1.63168	0.703998	4.09951	1.66817	0	0.357889	0.990085	0.347633	1.73047	0
Ethyl hydrocinnamate	1352.16	0	0	0	0	0	0	3.15196	2.71737	0.698612	0.0266516	0.363235	0.325113	4.09281	3.75532	0	0.797708	0.2	0	0	0	0	0	0	0
Hydrocinnamyl acetate	1371.6	0	0	0	0	0	0	6.33743	2.21901	3.59192	0.765305	2.09533	0.64974	5.70737	3.78019	2.39166	1.62914	6.70659	2.69246	0	0	0	0	0	0
Benzyl isopentanoate	1386.11	0	0	0	0	0	0	1.73112	0.571892	1.51189	0.17	1.03	0.225289	0	0	0	0	0	0	0.480106	0.163259	0.886707	0.163421	0.444672	2.76834
Ethyl 9-decenoate	1390	12.6574	12.9575	42.7489	10.9744	5.9252	19.0239	31.8723	13.9453	28.4337	1.65744	7.10805	7.13345	31.0781	29.6129	27.9259	7.30427	18.6225	25.1086	7.19238	9.91576	76.834	12.2376	14.6145	9.99455
Ethyl decanoate	1398	7.98143	15.8186	32.002	7.50641	6.54793	21.4859	15.7792	15.4412	18.8516	0.939102	5.05877	7.13979	13.6117	26.1805	25.4228	5.35208	16.8278	23.2229	3.03505	16.6054	52.3832	5.75717	13.305	9.62762
Cinnamyl acetate	1445.91	0	0	0	0	0	0	55.2995	21.0957	47.0061	5.41046	14.578	5.97728	36.2929	39.4032	28.412	8.2013	41.3324	28.3621	0	0	0	0	0	0
Ethyl cinnamate	1465.87	0	0	0	0	0	0	0.712929	0.324346	0.541807	0.080119	0.230355	0.139485	0.710692	0.769552	0.546896	0.229718	0.605008	0.57124	0	0	0	0	0	0
Phenethyl isovalerate	1489.02	0	0	0	0	0	0	1.17307	0.791607	1.27563	0.0977019	0.633222	0.23181	1.22681	0.980528	0.579336	0.207339	1.15917	0.653846	0	0	0	0	0	0
Isoeugenyl acetate	1529.74	0	0	0	0	0	0	0.674913	0.278156	0.755385	0.0391582	0.541191	0.126656	0.631333	0.758401	0.350758	0.2	1.27698	0.461341	0	0	0	0	0	0
Ethyl dodecanoate	1595	1.07908	2.12913	4.81107	0.451096	0.744957	4.39484	4.19701	3.70185	5.8298	0.306874	1.05397	2.47812	4.82352	6.23457	7.37064	1.36147	3.31672	7.50098	0.168537	5.91801	6.43968	0.892264	2.48534	1.17491
Benzyl Benzoate	1763.84	0	0	0	0	0	0	7.25258	1.41155	5.59753	0.616452	1.13279	0.96252	5.00558	6.26918	5.64769	1.81756	4.6758	6.87593	0	0	0	0	0	0
Ethyl tetradecanoate	1795	0	0	0	0	0	0	0.208263	0.187489	0.418523	0.0176004	0.034831	0.148543	0.334408	0.421251	0.684037	0.0787279	0.130851	0.583588	0	0	0	0	0	0
Ethyl 9-hexadecenoate	1974.87	14.52	7.23456	5.81546	6.69632	1.03352	6.89799	13.8848	3.7039	7.0556	1.68317	0.47978	1.85924	22.2339	16.5066	16.2957	8.8839	3.93435	11.3398	2.17193	14.4642	9.40277	23.8807	4.06808	2.27986
Ethyl hexadecanoate	1995	0.249716	0.251253	0	0.338381	0	0.272083	0.213468	0.168073	0.337643	0.0592326	0.0569945	0.0723228	0.412021	0.554427	0.613079	0.407117	0.412765	0.515546	0	0.453969	0.327226	1.04964	0.388351	0
Ethyl linoleate	2175	0	0	0	0	0	0	0.295787	0.0900194	0.44427	0.0444924	0.0129931	0.0348154	0.399707	0.551649	0.540184	0.162852	0.14559	0.462178	0	0.24014	0	0.451162	0.181733	0
Acids
Hexanoic acid	1005	0	0	0	0	0	0	1.17927	0	0.0685293	0	0	0	0	1.00244	0.489929	0	0	0	0.689035	0.451051	2.07749	0.89851	1.26097	11.3491
Octanoic acid	1198	9.14	7.19	13.4771	6.77831	4.28	5.31	8.87378	3.27407	9.59189	1.08134	4.17287	1.10188	6.40521	15.9239	8.39852	1.79173	25.0902	8.97433	15.871	5.2822	40.0571	8.94615	15.477	58.1294
Decanoic acid	1381	0	0	0	0	0	0	1.47623	1.19796	5.17188	0.255044	0.968257	0.40309	2.92208	4.48388	5.43894	2	5.07077	4.63054	0	0.663923	3.57292	0.834509	3.23	15.28
Hexadecanoic acid	1962.05	0	0	0	0	0	0	0	0.126865	0.47543	0.0877008	0.0921463	0	0	0.98665	0.448566	0.0930803	0.513966	0	0	0	0	0	0	0
Terpenes and derivative compounds
α-phellandrene	995.8	0.821678	0.8	0.83524	0.991261	0.480247	0.428426	1.40644	0.322403	0.319881	0.127569	0.365948	0.133608	1.49501	1.35368	0.724569	0.35571	1.72074	0.950144	0	0	0	0	0	0
β-myrcene	1001	8.06118	5.27286	9.56574	7.97615	7.05451	3.86497	3.04219	0.114084	0.104288	0.0764619	0.135422	0.036806	5.54976	3.56925	1.4377	0.986809	4.35607	2.34643	0	0	0	0	0	0
α-terpinene	1009.41	0	0	0	0	0	0	2.49104	0.484138	0	0	0	0	2.25181	2.11759	0	0	0	0	0	0	0	0	0	0
ο-cymene	1018.09	5.69071	14.5179	11.9163	9.59249	5.67321	15.5544	3.06667	2.22237	1.92853	0.316172	0.88851	0.541551	6.97328	3.58886	2.06385	2.45678	6.02014	3.5656	0	0	0	0.394505	0.2	3.2459
β-Phellandrene	1021.13	0	0	0	0	0	0	2.6209	0.952727	0.801929	0.329299	0.83408	0.344103	0	0	0	0	0	0	0	0	0	0	0	0
Limonene	1024	27.655	34.4908	28.5995	23.9925	17.9909	33.9301	0	0	0	0	0	0	18.9149	5.9448	5.48522	3.30695	17.1186	6.08883	0.341324	0.0998981	0	0.382028	0.213185	0
Eucalyptol	1023.88	1.59337	0.970277	1.65808	2.09141	1.13083	0.828243	9.73875	2.51377	2.43666	0.86836	2.14701	0.881853	5.38728	7.0574	2.54608	1.92585	7.40411	4.93454	0	0	0	0	0	0
trans-β-ocimene	1052.68	2.87232	2.2275	6.25816	3.38373	2.63912	1.55873	0.449436	0.0584144	0.0521279	0.0320187	0.0571089	0.0237938	2.31256	2.18183	1.14836	0.48115	2.15996	1.48909	0	0	0	0	0	0
γ-terpinene	1061.51	3.12246	3.10261	2.24719	2.44241	1.31115	2.19302	0.288368	0.100077	0.0839121	0.0259529	0.0548126	0.059689	2.06118	0.67209	0.463058	0.417787	1.14996	0.532566	0	0	0	0	0	0
Linalool oxide	1084.37	0	0	0	0	0	0	0	0	0	0	0	0	0.867383	1.11212	0.601031	0.284317	2.66419	0.764119	0	0	0	0	0	0
Terpinolen	1102.32	1.79433	1.12739	5.17974	1.51379	1.31537	0.793214	0.434997	0.100114	0.110123	0.0357203	0.078421	0.0445006	2.39995	2.26383	1.18651	0.563023	1.56153	1.52333	0	0	0	0	0	0
Linalool	1123	2351.15	1590.27	3014.02	2963.25	1710.54	1110.7	272.782	67.3856	76.0327	30.5532	68.1702	24.8359	1232.76	1350.16	722.298	440.622	2013.48	966.104	3.90161	1.47698	10.84	5.74868	2.81468	12.5138
Camphor	1155.14	0.750633	0.55709	1.04568	1.11569	0.825256	0.348368	2.07549	0.677176	0.811538	0.271359	0.695756	0.218844	1.9818	1.84806	1.03921	0.645856	3.79073	1.3529	0	0	0	0	0	0
Menthone	1164.11	7.47363	0	0	9.4001	0	0	3.39052	0	0	0.196016	0	0	2.07762	0	0.210884	0.842942	0	0	0	0	0	3.65661	0	6.42
Menthol	1178.87	32.683	0	0	42.1728	0	0	13.4091	0	0	1.01417	0	0	3.97906	0	0	4.84041	0	0	0	0	0	15.3597	0	0
[(-)-Terpinen-4-ol]	1180.75	15.7307	9.18657	22.6344	21.9618	10.9884	6.14088	13.863	3.8494	4.72258	1.573	3.66356	1.28717	17.3886	16.0291	9.1023	5.63177	26.307	11.3586	0	0	0	0	0	0
a-terpineol	1192	61.0587	38.3569	103.333	89.3623	45.831	22.9025	22.6256	6.06112	7.96033	2.59573	5.44754	1.89899	63.5454	54.4166	31.3913	17.0379	88.3839	38.5138	6.19987	1.43102	9.30003	3.20746	5.01208	20.4042
Nerol	1231.48	65.0276	33.9539	72.2512	84.1939	41.1955	16.2395	0	0	0	0	0	0	80.96	44.3357	23.6854	21.522	60.47	29.3167	0	0	0	0	0	0
Citronellol	1235	27.5908	13.0287	30.7111	32.8762	15.6772	8.97951	0	0	0	0	0	0	19.0264	16.2421	7.50343	10.0123	29.4123	2.6845	0.584477	0.14234	3.14893	2.01729	1.8408	1.99058
β-citral	1244.14	6.41533	6.80624	25.9405	14.3147	6.25682	8.71096	0	0	0	0	0	0	8.14373	15.5014	10.1902	2.46898	13.9073	13.0003	0	0	0	0	0	0
Carvotanacetone	1245.68	0	0	0	0	0	0	0.568762	0.196424	0.249937	0.0727551	0.195736	0.0635363	0	0	0	0	0	0	0	0	0	0	0	0
2-menthene	1265.12	0	0	0	0	0	0	2.73425	1.15074	0.2	0.381739	1.09658	0.451714	0	0	0	0	0	0	0	0	0	0	0	0
Geraniol	1266.67	172.88	120.809	264.6	210.418	80.75	72.3257	0	0	0	0	0	0	42.4944	40.5044	46.85	50.8888	50.01	80.8277	0	0	0	0	0	0
Citral	1277.47	5.42219	7.76913	27.3306	12.6712	4.55618	9.41731	0	0	0	0	0	0	8.6794	22.3075	15.3321	2.34881	13.6776	16.8112	0	0	0	0	0	0
Carvacrol	1301.85	0	0	0	0	0	0	0	0	0	0	0	0	1.51088	1.32571	0.716222	0.44495	0	0	0	0	0	0	0	0
Nerol acetate	1386	5.98845	3.16765	13.2712	6.73597	2.80497	3.94014	0	0	0	0	0	0	9.26416	7.77518	3.71699	1.72846	9.14848	5.81071	0	0	0	0	0	0
Copaene	1374.07	0	0	0	0	0	0	1.59219	1.48287	2.53221	0.1	0.512796	0.972292	0	0	0	0	0	0	0	0	0	0	0	0
Geranyl acetate	1385.49	10.2743	4.86731	20.6458	9.89113	3.63281	6.2555	0	0	0	0	0	0	17.5854	13.4807	6.38384	2.97498	13.2708	9.70263	0	0	0	0	0	0
Caryophyllene	1442	0	0	0	0	0	0	13.7472	11.5509	14.3848	0.48737	3.08184	12.4057	1.12741	1.39081	0.500929	0.401528	1.5848	6.05116	0	0	0	0	0	0
α-humulene	1479	0	0	0	0	0	0	5.25945	3.08013	5.26049	0.296795	1.29052	3.30036	0.921471	1.16868	0.528589	0.556745	1.13675	2.90152	0	0	0	0	0	0
α-farnesene	1510.58	0	0	0	0.186896	0	0	0	0	0	0.341186	0	0	0	0	0	3.71291	0	0	0	0	0	6.77911	0	0
δ-cadinene	1524.15	0	0	0	0	0	0	1.27885	0.531952	1.28834	0.0807944	0.311461	0.458911	0	0	0	0	0	0	0	0	0	0	0	0
E-Nerolidol	1565	0	0	0	0	0	0	1.1737	0.368613	0.857208	0.1	0.516346	0.168082	1.20106	0.655919	0.650797	0.160491	0.695042	0.595802	0	0	0	0	0	0
(-)-spathulenol	1576.45	0	0	0	0	0	0	0	0	0	0	0	0	2.03311	1.51129	1.1806	0.462345	1.69038	1.70751	0	0	0	0	0	0
Caryophyllene oxide	1581.24	0	0	0	0	0	0	23.8137	9.08125	25.1747	1.87698	11.0602	4.15948	14.9266	12.8154	6.41017	4.13432	14.5366	11.2308	0	0	0	0	0	0
Alcohols
3-methyl-1-butanol (Isoamyl alcohol)	721	36.3259	46.2861	96.2344	45.7178	23.524	22.9726	24.947	5.17954	2.86331	3.36345	6.56115	1.33283	23.3878	36.7216	19.444	14.0374	72.3367	27.0485	42.7321	28.2794	70.8712	27.4992	45.4688	116.216
2-methyl-1-butanol (Amyl alcohol)	722	19.5066	25.6674	24.6087	24.4054	20.3759	11.2037	20.2975	3.72423	3.1128	2.02916	3.16954	2.25555	13.1695	36.3374	10.9637	8.08946	32.2807	18.3343	15.4632	15.6669	23.0435	16.4524	20.5508	15
2,3-butanediol	756	0	4.60712	1.85854	0	4.98582	0	0	0.88299	0.416625	0.132464	0.330364	0.0760628	0	1.58635	0	0	7.87335	0	9.87521	4	9.43712	0	0.245638	31.4392
1-hexanol	861	0	0	1.65326	1.7548	0	1.11756	0	0	0.251831	0.156901	0	0.300956	0	0	0.40497	0.552569	0	1.4058	0	0	1.19798	0.695383	0	9.02139
1-octanol	1093.05	0.272512	0	0.606682	3.56405	0	0	0.702706	0.176867	0.218639	0.524835	0.266747	0.0510178	0.716358	0.649785	0.310089	1.425	2.02804	0.431551	0	0	0	7.65711	1.47161	0.404861
2-phenylethanol	1133	9.73124	7.03545	15.6401	19.108	12.5123	3.65853	14.4555	4.73946	4.83132	2.07684	7.10472	1.06789	18.1366	16.7408	11.3621	6.19182	62.1832	10.3724	23.3708	5.87833	33.9086	19.2217	50.2149	129.39
1-nonanol	1182.92	0	0	0	0	0	0	0	0.278986	0.385958	0.103848	0.519586	0	4.07677	3.61916	2.52404	0.952953	4.28257	2.74359	0	0	0	0	0	0
Hydrocinnamyl alcohol	1232.72	0	0	0	0	0	0	63.2114	19.1434	9.97099	9.70719	15.2214	5.02354	5.17	3.48575	1.79	1.64443	7.19	11.2682	0	0	0	0	0	0
1-decanol	1282	0	0	0	0	0	0	1.37087	1	1.46903	0.194875	0.780793	0.303814	0	0	0	0	0	0	0	0	0	0	0	0
Cinnamyl alcohol	1312.35	0	0	0	0	0	0	69.406	14.7392	25.0383	5.2188	11.2329	4.54614	38.2296	25.1045	24.9824	6.07687	41.8015	19.1843	0	0	0	0	0	0
Eugenol	1361	0	0	0	0	0	0	101.945	35.1348	64.4686	12.0893	28.0228	10.4546	66.7616	57.953	41.1032	15.493	90.8513	40.8563	0	0	0	0	0	0
2,4-bis(1,1-dimethylethyl)-phenol	1516	0.0949746	0.116519	0.854021	0.177616	0.0921825	0.392787	0.911734	0.635692	1.93302	0.118855	0.63681	0.70745	1.01565	0.753989	1.64366	0.272528	0.879905	1.73169	0.1	0.155992	6.69359	0.29688	0.425684	0.651808
Carbonyl compounds
Hexanal	800	0	0	0	0.70656	0	0	0	0.0283288	0.039851	0.025478	0	0.0196696	0.140864	0	0	0.0592957	0.332498	0	0	0.17293	0	0.212694	0.898606	0
Benzaldehyde	947	0	0	0	0	0	0	0.483439	0.466788	1.88556	0.107441	0.258465	0.285331	0.342193	0.946066	1.22322	0.155058	0.722203	1.28865	0	0	0	0.242374	0.1	0.156589
Prenylacetone	987.561	0.417457	0.466876	1.27665	1.0324	0.599086	0.433696	0	0	0	0	0	0	0.394504	0	0.219375	0	0.845129	0	0	0	0	0	0	0
Nonanal	1127.64	0	0	0	0	0	0	1.29207	0.330454	0	0.129692	1.24741	0	0	0	2.80334	1.75363	0	0	0.400456	0.625786	2.93713	1.06536	3.86125	1
Benzenepropanal	1171.64	0	0	0	0	0	0	5.06797	9.26728	11.363	0.98485	3.60707	2.48651	3.38635	10.3197	9.91336	0.637416	8.86705	9.55576	0	0	0	0	0	0
Decanal	1204.01	0	0	0	0	0	0	0	0.756224	0	0	0.825583	0	0.872305	1.07598	0.695001	0	2.02621	0.580558	0	0.313035	0	0.486849	1.63096	0
Cinnamaldehyde	1274.69	0	0	0	0	0	0	12.082	36.2116	126.68	2.19448	10.9453	12.6607	7.64525	132.69	178.3	4.29504	25.1027	90.656	0	0	0	0	0	0
Isopropyl styryl ketone	1459.08	0	0	0	0	0	0	4.72741	2.34249	3.0512	0.644165	0.457012	0.675731	2.7297	3.93945	2.43562	0.664057	1.55622	2.71949	0	0	0	0	0	0
Miscelaneous compounds
1,1-diethoxy ethane	716	1.59578	5.78517	0.919829	2.52611	1.98922	0.903274	1.01693	0.552881	0	0.122145	0.291484	0.0307979	1.63114	11.5407	1.58102	1.31892	4.08666	1.98585	0	1.78978	0	1.17008	2.35636	0
Toluene	735	1.7529	1.95219	1.29894	2.2117	2.18036	1.38672	0.545688	0	0	0	0	0	1.56481	1.45008	1.19092	1.45913	2.9488	1.96477	0.989903	1.3585	3.55318	1.72365	1.46003	1.5
Styrene	873	0	0	0	0	0	0	0.441785	3.63358	0.100267	0.240898	3.72804	0.561658	0.645017	6.63504	0.0771752	0.994816	25.7355	1.92654	0	0.254113	0	0.103784	1.29278	0
1,3,5-trimethylbenzene	956	0	0.504605	0.493667	0.726915	0.518386	0.466336	0.128976	0.375598	0.339474	0.222829	0.372417	0.19344	0.586674	0.39292	0.436294	0.423668	0.799764	0.524964	0.298798	0.354406	5.9	0.605948	0.535436	0
Methyl(1-methylethenyl)-benzene	1104.05	0	0	0	0	0	0	0.311314	0.129929	0.149983	0.024981	0.0783476	0.0286726	0.342399	0	0	0	0.393741	0.190467	0	0	0	0	0	0
1-ethenyl-4-methoxy-benzene (p-methoxystyrene)	1151.23	0	0	0	0	0	0	0.445665	0.210465	0.256489	0.1	0.236699	0.0438905	0	0	0	0	0	0	0	0	0	0	0	0
Safrole	1291.98	0	0	0	0	0	0	6.86498	3.01976	6.58849	0.509616	2.77663	0.732691	5.24376	4.92621	2.38834	1.00659	5.06168	3.46559	0	0	0	0	0	0
Tetradecane	1399	0	0	0	0	0	0	0.1	0.370313	0.591697	0.117888	0.392091	0.264185	0	0	0	0	0	0	0.171248	0.1	1.45	0	0	0
1,2-dimethoxy-4-(2-propenyl)-benzene	1403.59	0	0	0	0	0	0	0.286957	0.123155	0.243217	0.49189	0.195673	0.0512157	0.36575	0	0	0.759288	0.737101	0.1	0	0	0	0.221006	0.230691	0.1
Total esters		264.345	185.017	356.699	190.501	82.3029	193.055	453.942	191.665	243.67	37.7434	87.154	59	534.356	470.147	302.466	153.639	375.483	252.919	265.773	220.921	1044.7	332.512	235.833	358.912
Total acids		9.14	7.19	13.4771	6.77831	4.28	5.31	11.5293	4.5989	15.3077	1.42408	5.23327	1.50497	9.3273	22.3969	14.776	3.88481	30.675	13.6049	16.56	6.39718	45.7075	10.6792	19.9679	84.7585
Total terpenes and derivative compounds		2814.05	1891.28	3662.04	3550.53	1960.65	1325.12	401.853	112.284	145.312	41.7527	100.604	52.2869	1577.82	1631.33	903.348	582.217	2385.66	1220.16	11.0273	3.15023	23.289	37.5454	10.0807	44.5745
Total alcohols		65.9312	83.7125	141.456	94.7276	61.4903	39.3451	297.248	85.6352	114.96	35.7165	73.8469	26.1199	170.664	182.952	114.528	54.736	321.707	133.377	91.5413	53.9805	145.152	71.8227	118.377	302.122
Total carbonyl compounds		0.417457	0.466876	1.27665	1.73896	0.599086	0.433696	23.6529	49.4032	143.02	4.0861	17.3409	16.1279	15.5112	148.971	195.59	7.56449	39.452	104.8	0.400456	1.11175	2.93713	2.00728	6.49082	1.15659
Total miscelaneous compounds		3.34868	8.24196	2.71244	5.46473	4.68797	2.75633	10.1423	8.41568	8.26962	1.83025	8.07138	1.90655	10.3795	24.945	5.67375	5.96242	39.7632	10.1582	1.45995	3.8568	10.9032	3.82447	5.87529	1.6
Total volatiles		3157.24	2175.91	4177.66	3849.74	2114.01	1566.02	1198.37	452.002	670.54	122.553	292.25	156.946	2318.06	2480.74	1536.38	808.004	3192.74	1735.02	386.762	289.418	1272.69	458.391	396.625	793.123
